# Supplementary material for: Do Determinants of Quality of Life Differ in Older People Living in the Community and Nursing Homes?
Source: MDPI journal article supplement (doi:10.3390/ijerph20020916), 2023-01-04
Supplement: s1 [file s1]

**Supplementary Table S1.** Relationships of EuroQol-5D test dimensions to age, nutritional parameters and PA in NH residents.

|                          | Nursing Homes Residents |                     |         |                     |                     |         |                     |                     |         |                     |                     |         |                     |                     |         |
|--------------------------|-------------------------|---------------------|---------|---------------------|---------------------|---------|---------------------|---------------------|---------|---------------------|---------------------|---------|---------------------|---------------------|---------|
|                          | Mobility                |                     |         | Self-Care           |                     |         | Usual Activities    |                     |         | Pain/Discomfort     |                     |         | Anxiety/Depression  |                     |         |
|                          | No Problems             | Problems            | p Value | No Problems         | Problems            | p Value | No Problems         | Problems            | p Value | No Problems         | Problems            | p Value | No Problems         | Problems            | p Value |
| Age                      | 71.5<br>(64.0;80.0)     | 76.5<br>(68.0;84.0) | 0.048   | 72.0<br>(66.0;82.0) | 74.0<br>(68.0;84.0) | ns      | 72.0<br>(64.0;82.0) | 75.0<br>(68.0;82.0) | ns      | 68.0<br>(64.0;74.0) | 75.0<br>(67.0;83.0) | ns      | 68.0<br>(64.0;80.0) | 75.0<br>(68.0;83.0) | 0.034   |
| MNA                      | 22.5<br>(20.5;24.5)     | 19.8<br>(17.5;23.5) | 0.014   | 22.5<br>(19.0;24.0) | 21.0<br>(18.5;23.0) | ns      | 21.5<br>(19.0;23.5) | 21.0<br>(18.5;23.5) | ns      | 23.0<br>(21.0;25.5) | 20.5<br>(18.5;23.5) | 0.004   | 23.0<br>(20.5;24.5) | 20.5<br>(18.0;23.0) | 0.004   |
| BMI                      | 25.9<br>(22.3;30.8)     | 27.7<br>(23.0;32.7) | ns      | 27.1<br>(23.1;30.8) | 25.8<br>(21.8;33.6) | ns      | 26.1<br>(23.1;30.4) | 27.5<br>(22.0;32.9) | ns      | 26.8<br>(23.9;31.0) | 26.6<br>(22.3;31.3) | ns      | 25.0<br>(21.4;30.4) | 27.5<br>(23.8;32.0) | ns      |
| WHtR                     | 0.60<br>(0.54;0.66)     | 0.60<br>(0.54;0.69) | ns      | 0.60<br>(0.55;0.65) | 0.60<br>(0.53;0.70) | ns      | 0.60<br>(0.55;0.65) | 0.60<br>(0.53;0.69) | ns      | 0.60<br>(0.54;0.67) | 0.60<br>(0.54;0.66) | ns      | 0.57<br>(0.52;0.62) | 0.61<br>(0.55;0.65) | ns      |
| Waist (cm)               | 94.0<br>(84.0;101)      | 92.0<br>(84.0;105)  | ns      | 94.0<br>(86.0;102)  | 93.0<br>(82.0;105)  | ns      | 94.0<br>(84.0;102)  | 93.0<br>(84.0;103)  | ns      | 98.0<br>(87.0;107)  | 92.0<br>(84.0;102)  | ns      | 94.0<br>(82.0;103)  | 93.0<br>(84.0;103)  | ns      |
| Calf (cm)                | 34.7<br>(32.0;38.0)     | 34.8<br>(32.0;37.0) | ns      | 34.5<br>(32.0;38.0) | 36.0<br>(32.0;37.0) | ns      | 34.5<br>(33.0;37.0) | 36.0<br>(31.0;37.0) | ns      | 35.0<br>(32.0;37.0) | 34.5<br>(32.0;37.0) | ns      | 34.5<br>(33.0;37.0) | 35.0<br>(33.0;37.0) | ns      |
| FFM (%)                  | 62.2<br>(56.7;72.0)     | 61.2<br>(51.6;65.8) | ns      | 62.1<br>(55.4;69.9) | 61.1<br>(53.1;65.7) | ns      | 62.0<br>(56.7;69.9) | 61.1<br>(53.1;68.8) | ns      | 60.9<br>(55.4;68.9) | 62.0<br>(55.4;68.8) | ns      | 66.4<br>(59.8;74.1) | 60.3<br>(54.4;65.1) | 0.005   |
| FM (%)                   | 37.9<br>(28.0;43.8)     | 38.7<br>(34.2;46.9) | ns      | 38.0<br>(30.1;44.6) | 38.7<br>(34.4;43.3) | ns      | 38.0<br>(30.1;43.0) | 39.0<br>(32.0;47.7) | ns      | 40.2<br>(33.1;49.1) | 37.0<br>(30.1;44.4) | ns      | 34.7<br>(28.0;42.4) | 39.3<br>(34.8;45.1) | 0.005   |
| Body volume (Lt)         | 62.4<br>(54.1;77.8)     | 67.4<br>(55.3;77.4) | ns      | 66.8<br>(56.6;77.1) | 62.1<br>(54.1;81.0) | ns      | 64.2<br>(55.0;77.8) | 67.9<br>(55.3;77.4) | ns      | 72.6<br>(56.3;78.6) | 64.2<br>(54.1;77.4) | ns      | 66.0<br>(55.0;78.6) | 64.5<br>(55.4;76.1) | ns      |
| Body density             | 1.01<br>(1.00;1.04)     | 1.01<br>(1.00;1.02) | ns      | 1.01<br>(1.00;1.03) | 1.01<br>(1.00;1.03) | ns      | 1.01<br>(1.00;1.03) | 1.01<br>(1.00;1.03) | ns      | 1.01<br>(1.00;1.03) | 1.01<br>(1.00;1.03) | ns      | 1.02<br>(1.00;1.04) | 1.01<br>(1.00;1.02) | 0.005   |
| RMR (kcal/kg)            | 19.2<br>(16.3;22.5)     | 18.5<br>(16.0;20.7) | ns      | 18.8<br>(16.3;21.4) | 18.9<br>(15.5;21.3) | ns      | 19.0<br>(16.8;21.0) | 18.7<br>(15.8;21.5) | ns      | 18.9<br>(16.8;21.3) | 18.8<br>(16.1;21.4) | ns      | 19.8<br>(17.9;24.1) | 18.7<br>(16.1;20.5) | ns      |
| TBW (%)                  | 51.0<br>(46.1;55.2)     | 48.8<br>(45.0;52.7) | ns      | 50.5<br>(45.9;53.5) | 49.6<br>(45.1;53.1) | ns      | 50.8<br>(45.9;53.1) | 49.2<br>(45.0;55.3) | ns      | 47.7<br>(45.4;52.5) | 50.0<br>(46.1;53.3) | ns      | 52.0<br>(47.2;56.1) | 48.8<br>(45.1;52.7) | ns      |
| ECW/ICW                  | 0.90<br>(0.84;0.94)     | 0.91<br>(0.85;0.95) | ns      | 0.91<br>(0.85;0.94) | 0.91<br>(0.84;0.96) | ns      | 0.92<br>(0.87;0.95) | 0.89<br>(0.83;0.94) | ns      | 0.89<br>(0.84;0.93) | 0.91<br>(0.85;0.95) | ns      | 0.90<br>(0.80;0.94) | 0.91<br>(0.87;0.95) | ns      |
| BCM (%)                  | 34.3<br>(31.8;38.1)     | 33.7<br>(30.2;36.6) | ns      | 34.3<br>(31.3;37.7) | 33.8<br>(29.8;36.3) | ns      | 34.3<br>(31.8;37.1) | 33.8<br>(30.9;37.7) | ns      | 33.2<br>(30.8;36.5) | 34.4<br>(31.7;37.7) | ns      | 36.3<br>(33.6;40.3) | 33.4<br>(31.8;36.5) | 0.047   |
| SMI (kg/m <sup>2</sup> ) | 7.6<br>(6.8;8.5)        | 8.3<br>(7.5;9.3)    | ns      | 7.6<br>(6.7;9.2)    | 7.6<br>(6.3;8.6)    | ns      | 7.4<br>(6.4;8.6)    | 7.9<br>(6.9;8.8)    | ns      | 7.9<br>(6.2;8.5)    | 7.5<br>(6.9;8.9)    | ns      | 8.0<br>(6.9;9.4)    | 7.5<br>(6.7;8.6)    | ns      |
| Z (Ω)                    | 540<br>(493;611)        | 550<br>(469;626)    | ns      | 532<br>(485;611)    | 553<br>(506;620)    | ns      | 556<br>(487;620)    | 545<br>(475;598)    | ns      | 582<br>(485;643)    | 545<br>(486;598)    | ns      | 532<br>(478;618)    | 553<br>(490;613)    | ns      |
| R (Ω)                    | 537<br>(489;607)        | 546<br>(466;623)    | ns      | 526<br>(482;607)    | 550<br>(500;617)    | ns      | 553<br>(483;617)    | 539<br>(473;595)    | ns      | 578<br>(483;639)    | 539<br>(483;595)    | ns      | 526<br>(474;610)    | 550<br>(487;609)    | ns      |
| Xc (Ω)                   | 68.1<br>(60.1;73.6)     | 60.7<br>(49.8;78.3) | ns      | 66.2<br>(55.8;73.4) | 67.7<br>(57.2;79.9) | ns      | 67.3<br>(57.0;73.1) | 64.6<br>(55.8;78.3) | ns      | 67.3<br>(55.5;78.2) | 66.3<br>(56.4;73.7) | ns      | 67.3<br>(60.1;73.7) | 66.3<br>(56.2;74.2) | ns      |
| PhA                      | 7.14                    | 6.61                | 0.044   | 6.89                | 6.65                | ns      | 6.86                | 6.84                | ns      | 6.72                | 6.86                | ns      | 7.24                | 6.75                | ns      |

|        |             |             |       |             |             |    |             |             |    |             |             |    |             |             |        |
|--------|-------------|-------------|-------|-------------|-------------|----|-------------|-------------|----|-------------|-------------|----|-------------|-------------|--------|
|        | (6.38;7.71) | (5.91;7.37) |       | (6.19;7.53) | (6.08;7.86) |    | (6.15;7.51) | (6.11;7.86) |    | (5.72;7.53) | (6.19;7.58) |    | (6.13;7.94) | (6.15;7.38) |        |
| PA-EE  | 34.4        | 33.9        | ns    | 34.5        | 33.4        | ns | 34.4        | 33.7        | ns | 34.0        | 34.2        | ns | 35.5        | 33.7        | 0.0004 |
|        | (32.6;37.8) | (32.6;36.9) |       | (32.8;38.3) | (31.9;36.0) |    | (32.6;38.4) | (32.4;36.8) |    | (33.1;35.5) | (32.4;37.4) |    | (33.9;39.4) | (31.9;36.0) |        |
| PA-HRB | 1.00        | 0.50        | 0.004 | 1.0         | 1.0         | ns | 1.0         | 1.0         | ns | 2.0         | 1.0         | ns | 2.0         | 1.0         | 0.005  |
|        | (0.00;2.00) | (0.00;1.00) |       | (0.0;2.0)   | (0.0;1.0)   |    | (0.0;2.0)   | (0.0;2.0)   |    | (0.0;2.0)   | (0.0;2.0)   |    | (0.0;2.0)   | (0.0;1.0)   |        |

MNA: Mini Nutritional Assessment; BMI: body mass index; WHtR: waist-to-height ratio; FM: fat mass; FFM: fat-free mass; RMR: resting metabolic rate; TBW: total body water; ECW/ICW: extracellular water and intracellular water ratio; BCM: body cell mass; SMI: skeletal muscle index; Z: impedance; R: resistance; Xc: reactance; PhA: phase angle; Ω: Ohm; VAS scale: visual analogue scale; PA-EE: physical activity energy expenditure; PA-HRB: physical activity health related behaviours; NH: nursing home group; CD: community- dwelling group; ns: not significant.

**Supplementary Table S2.** Relationships of EuroQol-5D test dimensions to age, nutritional parameters and PA in CD older subjects.

|                  | Community Dwelling  |                      |         |                      |                     |         |                     |                     |         |                     |                     |         |                     |                     |         |
|------------------|---------------------|----------------------|---------|----------------------|---------------------|---------|---------------------|---------------------|---------|---------------------|---------------------|---------|---------------------|---------------------|---------|
|                  | Mobility            |                      |         | Self-Care            |                     |         | Usual Activities    |                     |         | Pain/Discomfort     |                     |         | Anxiety/Depression  |                     |         |
|                  | No Problems         | Problems             | p-Value | No Problems          | Problems            | p-Value | No Problems         | Problems            | p-Value | No Problems         | Problems            | p-Value | No Problems         | Problems            | p-Value |
| Age              | 74.0<br>(66.0;83.5) | 75<br>(70.5;82.0)    | ns      | 74.0<br>(66.0;82.5)  | 78.5<br>(68.0;84.5) | Ns      | 74.0<br>(66.5;82.5) | 76.0<br>(66.5;83.5) | ns      | 75.0<br>(71.0;82.0) | 75.0<br>(66.0;83.0) | ns      | 74.0<br>(67.0;79.0) | 75.0<br>(66.0;84.0) | ns      |
| MNA              | 27.0<br>(25.5;28.3) | 24.8<br>(22.8;27.0)  | 0.002   | 26.50<br>(24.3;28.0) | 24.0<br>(21.3;25.5) | 0.001   | 27.0<br>(24.8;28.5) | 25.3<br>(22.8;27.0) | 0.005   | 28.0<br>(26.0;29.0) | 25.5<br>(23.5;27.5) | 0.012   | 28.0<br>(25.5;28.5) | 25.5<br>(23.5;27.5) | 0.021   |
| BMI              | 27.2<br>(25.2;29.2) | 29.7<br>(25.8;33.1)  | 0.015   | 27.5<br>(25.2;30.5)  | 29.7<br>(25.7;32.1) | ns      | 27.5<br>(25.8;30.5) | 29.5<br>(24.7;31.2) | ns      | 27.3<br>(25.5;29.0) | 28.7<br>(25.2;31.0) | ns      | 27.3<br>(24.4;28.1) | 29.0<br>(25.7;31.6) | 0.022   |
| WHtR             | 0.58<br>(0.54;0.62) | 0.61<br>(0.55;0.65)  | 0.04    | 0.58<br>(0.54;0.64)  | 0.61<br>(0.57;0.66) | ns      | 0.58<br>(0.55;0.64) | 0.59<br>(0.54;0.64) | ns      | 0.57<br>(0.56;0.61) | 0.59<br>(0.54;0.64) | ns      | 0.56<br>(0.53;0.58) | 0.61<br>(0.55;0.64) | 0.014   |
| Waist (cm)       | 94.0<br>(86.5;100)  | 93.5<br>(87.5;102.5) | ns      | 93.5<br>(86.5;101)   | 95.0<br>(88.0;102)  | ns      | 95.0<br>(87.5;102)  | 93.0<br>(86.5;99.0) | ns      | 94.0<br>(84.8;100)  | 94.0<br>(87.5;102)  | ns      | 88.5<br>(84.0;100)  | 95.0<br>(88.0;102)  | ns      |
| Calf (cm)        | 36.5<br>(35.0;38.3) | 37.0<br>(35.0;40.0)  | ns      | 36.8<br>(35.0;39.0)  | 37.0<br>(34.3;39.0) | ns      | 36.5<br>(35.0;39.0) | 37.0<br>(35.0;39.0) | ns      | 36.3<br>(34.5;38.0) | 37.0<br>(35.0;39.0) | ns      | 36.0<br>(35.0;38.0) | 37.0<br>(35.0;39.0) | ns      |
| FFM (%)          | 66.4<br>(60.1;72.1) | 59.8<br>(54.4;64.3)  | <0.0001 | 62.4<br>(59.1;68.6)  | 59.4<br>(54.9;65.2) | ns      | 62.2<br>(58.6;68.5) | 61.7<br>(55.7;68.4) | ns      | 66.3<br>(61.2;72.0) | 60.9<br>(56.0;68.3) | 0.015   | 67.6<br>(61.6;72.9) | 60.4<br>(55.8;66.6) | 0.0007  |
| FM (%)           | 34.8<br>(28.3;40.4) | 39.9<br>(35.2;46.3)  | <0.0001 | 37.8<br>(31.6;41.1)  | 39.9<br>(34.8;46.0) | ns      | 39.1<br>(32.0;41.1) | 36.5<br>(31.1;44.3) | ns      | 34.8<br>(28.9;40.3) | 39.0<br>(31.7;44.2) | 0.015   | 34.8<br>(28.9;40.3) | 39.0<br>(28.9;40.3) | 0.0007  |
| Body volume (Lt) | 70.7<br>(61.8;78.4) | 68.9<br>(62.0;79.0)  | ns      | 70.3<br>(62.0;87.8)  | 67.9<br>(61.0;76.0) | ns      | 71.3<br>(63.9;81.9) | 68.2<br>(59.7;75.9) | ns      | 69.4<br>(61.3;78.9) | 69.6<br>(62.0;78.4) | ns      | 67.6<br>(59.2;79.1) | 70.1<br>(62.2;77.9) | ns      |
| Body density     | 1.02<br>(1.01;1.04) | 1.01<br>(1.00;1.02)  | <0.0001 | 1.02<br>(1.01;1.03)  | 1.01<br>(1.00;1.02) | ns      | 1.01<br>(1.01;1.03) | 1.01<br>(1.00;1.03) | ns      | 1.02<br>(1.01;1.04) | 1.01<br>(1.00;1.03) | 0.019   | 1.03<br>(1.01;1.04) | 1.01<br>(1.00;1.02) | 0.001   |
| RMR (kcal/kg)    | 18.5<br>(17.7;20.3) | 17.3<br>(15.6;19.4)  | 0.001   | 18.2<br>(17.2;20.1)  | 17.2<br>(15.7;19.8) | ns      | 18.0<br>(17.1;19.8) | 18.1<br>(16.2;20.3) | ns      | 18.7<br>(18.0;19.8) | 17.9<br>(16.4;20.1) | ns      | 19.4<br>(18.2;20.2) | 17.7<br>(16.1;20.0) | 0.002   |
| TBW (%)          | 53.4<br>(49.8;57.4) | 48.7<br>(47.4;52.2)  | 0.0002  | 51.7<br>(47.8;55.2)  | 49.0<br>(47.6;53.4) | ns      | 51.4<br>(47.7;54.5) | 50.1<br>(47.8;54.7) | ns      | 53.2<br>(51.1;58.1) | 50.3<br>(47.5;54.1) | 0.017   | 53.7<br>(51.7;56.8) | 50.1<br>(47.4;53.9) | 0.0015  |
| ECW/ICW          | 0.90<br>(0.84;0.91) | 0.90<br>(0.86;0.92)  | 0.012   | 0.88<br>(0.80;0.92)  | 0.90<br>(0.86;0.93) | ns      | 0.88<br>(0.78;0.91) | 0.90<br>(0.85;0.92) | 0.034   | 0.79<br>(0.75;0.92) | 0.89<br>(0.84;0.92) | ns      | 0.86<br>(0.75;0.92) | 0.89<br>(0.84;0.92) | ns      |
| BCM (%)          | 36.9                | 33.4                 | 0.0001  | 34.8                 | 33.6                | ns      | 34.8                | 34.4                | ns      | 36.4                | 34.3                | 0.038   | 37.5                | 34.0                | 0.001   |

|                          |             |             |       |             |             |        |             |             |       |             |             |    |             |             |       |
|--------------------------|-------------|-------------|-------|-------------|-------------|--------|-------------|-------------|-------|-------------|-------------|----|-------------|-------------|-------|
|                          | (33.8;40.1) | (31.8;35.5) |       | (32.8;38.3) | (32.2;36.7) |        | (33.0;38.2) | (32.2;38.0) |       | (33.6;41.1) | (32.2;37.5) |    | (34.7;40.7) | (32.1;37.7) |       |
| SMI (kg/m <sup>2</sup> ) | 8.8         | 8.3         | 0.017 | 8.5         | 8.3         | ns     | 8.6         | 8.3         | ns    | 9.4         | 8.4         | ns | 8.9         | 8.3         | ns    |
|                          | (7.6;10.8)  | (7.5;9.3)   |       | (7.6;10.3)  | (7.4;9.2)   |        | (7.5;10.5)  | (7.5;9.3)   |       | (7.6;10.9)  | (7.5;9.7)   |    | (7.7;10.7)  | (7.5;9.7)   |       |
| Z (Ω)                    | 540         | 550         | ns    | 483         | 494         | ns     | 470         | 494         | ns    | 475         | 487         | ns | 454         | 487         | ns    |
|                          | (493;611)   | (469;626)   |       | (426;525)   | (452;520)   |        | (426;523)   | (447;531)   |       | (428;523)   | (432;526)   |    | (434;522)   | (430;526)   |       |
| R (Ω)                    | 469         | 492         | ns    | 479         | 490         | ns     | 466         | 490         | ns    | 472         | 482         | ns | 450         | 483         | ns    |
|                          | (421;515)   | (438;528)   |       | (422;521)   | (449;517)   |        | (422;519)   | (443;528)   |       | (423;519)   | (428;521)   |    | (429;518)   | (427;521)   |       |
| Xc (Ω)                   | 63.6        | 64.2        | ns    | 64.0        | 60.2        | ns     | 63.6        | 64.2        | ns    | 63.0        | 64.0        | ns | 62.4        | 64.0        | ns    |
|                          | (57.0;69.8) | (54.3;71.5) |       | (57.0;71.8) | (53.1;67.3) |        | (57.0;69.8) | (53.6;71.5) |       | (59.4;68.4) | (55.2;72.1) |    | (59.4;67.8) | (55.0;72.2) |       |
| PhA                      | 7.78        | 7.24        | 0.009 | 7.58        | 7.03        | 0.005  | 7.66        | 7.20        | 0.017 | 7.53        | 7.38        | ns | 7.56        | 7.34        | ns    |
|                          | (7.11;8.32) | (6.83;7.78) |       | (7.05;8.18) | (6.21;7.57) |        | (7.08;8.23) | (6.9;7.9)   |       | (7.11;8.57) | (6.91;8.06) |    | (7.12;8.24) | (6.9;8.05)  |       |
| PA-EE                    | 36.8        | 37.3        | ns    | 37.0        | 37.4        | ns     | 37.3        | 36.6        | ns    | 36.9        | 37.0        | ns | 40.2        | 36.5        | 0.043 |
|                          | (34.9;42.4) | (35.0;41.4) |       | (35.0;41.9) | (34.8;41.3) |        | (35.2;43.1) | (34.4;41.3) |       | (34.4;44.7) | (35.0;41.4) |    | (35.2;44.7) | (34.5;40.8) |       |
| PA-HRB                   | 2.0         | 1.0         | 0.001 | 2.0         | 1.0         | 0.0005 | 2.0         | 1.0         | ns    | 2.0         | 1.0         | ns | 2.0         | 1.0         | 0.017 |
|                          | (1.0;3.0)   | (0.0;2.0)   |       | (1.0;3.0)   | (0.0;1.0)   |        | (1.0;3.0)   | (0.5;2.0)   |       | (0.5;3.0)   | (1.0;2.0)   |    | (1.0;3.0)   | (0.0;2.0)   |       |

MNA: Mini Nutritional Assessment; BMI: body mass index; WHtR: waist-to-height ratio; FM: fat mass; FFM: fat-free mass; RMR: resting metabolic rate; TBW: total body water; ECW/ICW: extracellular water and intracellular water ratio; BCM: body cell mass; SMI: skeletal muscle index; Z: impedance; R: resistance; Xc: reactance; PhA: phase angle; Ω: Ohm; VAS scale: visual analogue scale; PA-EE: physical activity energy expenditure; PA-HRB: physical activity health related behaviours; NH: nursing home group; CD: community- dwelling group; ns: not significant.
